# Supplementary material
Source: publisher figshare collection journal article supplement (https://karger.figshare.com/articles/dataset/_/5104531)
Supplement: Supplementary file 1 [file 1]

## Supplementary Material- *online only*

**Table 1a: Absolute (Abs) and relative (Rel) genotypic frequencies  $\pm$  standard errors (SE) of APOA1-MspI-RelLP 628 A>G polymorphism in the three age groups in females.**

|           | Age Group            |               |                       |               |                     |               |              |               |
|-----------|----------------------|---------------|-----------------------|---------------|---------------------|---------------|--------------|---------------|
| Genotype* | Group 1 (< 73 years) |               | Group 2 (73-90 years) |               | Group 3 (>90 years) |               | Total sample |               |
|           | Abs                  | Rel ± SE      | Abs                   | Rel ± SE      | Abs                 | Rel ± SE      | Abs          | Rel ± SE      |
|           |                      |               |                       |               |                     |               |              |               |
| PP        | 198                  | 0.600 ± 0.027 | 69                    | 0.663 ± 0.046 | 53                  | 0.609 ± 0.052 | 320          | 0.614 ± 0.021 |
| AP        | 114                  | 0.345 ± 0.026 | 31                    | 0.298 ± 0.045 | 31                  | 0.356 ± 0.051 | 176          | 0.338 ± 0.021 |
| AA        | 18                   | 0.055 ± 0.013 | 4                     | 0.038 ± 0.019 | 3                   | 0.034 ± 0.020 | 25           | 0.048 ± 0.009 |
|           |                      |               |                       |               |                     |               |              |               |

\*A/P denotes Absence/Presence of the restriction site.

**Table 1b: Absolute (Abs) and relative (Rel) allelic frequencies  $\pm$  standard errors (SE) of APOA1-MspI-RelLP 628 A>G polymorphism in the three age groups in females**

|             | Age Group            |               |                       |               |                     |               |              |               |
|-------------|----------------------|---------------|-----------------------|---------------|---------------------|---------------|--------------|---------------|
| Allele<br>* | Group 1 (< 73 years) |               | Group 2 (73-90 years) |               | Group 3 (>90 years) |               | Total sample |               |
|             | Abs                  | Rel ± SE      | Abs                   | Rel ± SE      | Abs                 | Rel ± SE      | Abs          | Rel ± SE      |
|             |                      |               |                       |               |                     |               |              |               |
| P           | 510                  | 0.773 ± 0.016 | 169                   | 0.813 ± 0.027 | 137                 | 0.787 ± 0.031 | 816          | 0.783 ± 0.013 |
| A           | 150                  | 0.227 ± 0.016 | 39                    | 0.188 ± 0.027 | 37                  | 0.213 ± 0.031 | 226          | 0.217 ± 0.013 |
|             |                      |               |                       |               |                     |               |              |               |

\*A/P denotes Absence/Presence of the restriction site.

Test for Hardy-Weinberg equilibrium:

- Group 1: Chi-square = 0.090, df = 1, p = 0.7642
- Group 2: Chi-square = 0.049, df = 1, p = 0.8248
- Group 3: Chi-square = 0.358, df = 1, p = 0.5496

**Table 2a: Absolute (Abs) and relative (Rel) genotypic frequencies  $\pm$  standard errors (SE) of APOA1-MspI-RelLP 628 A>G polymorphism in the three age groups in males.**

|           | Age Group           |               |                       |               |                      |               |              |               |
|-----------|---------------------|---------------|-----------------------|---------------|----------------------|---------------|--------------|---------------|
| Genotype* | Group 1 (<66 years) |               | Group 2 (66-87 years) |               | Group 3 (> 87 years) |               | Total sample |               |
|           | Abs                 | Rel ± SE      | Abs                   | Rel ± SE      | Abs                  | Rel ± SE      | Abs          | Rel ± SE      |
|           |                     |               |                       |               |                      |               |              |               |
| PP        | 105                 | 0.475 ± 0.034 | 74                    | 0.617 ± 0.040 | 75                   | 0.682 ± 0.044 | 254          | 0.563 ± 0.023 |
| AP        | 97                  | 0.439 ± 0.033 | 44                    | 0.367 ± 0.040 | 30                   | 0.273 ± 0.042 | 171          | 0.379 ± 0.023 |
| AA        | 19                  | 0.086 ± 0.019 | 2                     | 0.017 ± 0.012 | 5                    | 0.045 ± 0.020 | 26           | 0.058 ± 0.011 |
|           |                     |               |                       |               |                      |               |              |               |

\*A/P denotes Absence/Presence of the restriction site.

**Table 2b: Absolute (Abs) and relative (Rel) allelic frequencies  $\pm$  standard errors (SE) of APOA1-MspI-RelLP 628 A>G polymorphism in the three age groups in females**

|         | Age Group           |               |                       |               |                      |               |              |               |
|---------|---------------------|---------------|-----------------------|---------------|----------------------|---------------|--------------|---------------|
| Allele* | Group 1 (<66 years) |               | Group 2 (66-87 years) |               | Group 3 (> 87 years) |               | Total sample |               |
|         | Abs                 | Rel ± SE      | Abs                   | Rel ± SE      | Abs                  | Rel ± SE      | Abs          | Rel ± SE      |
|         |                     |               |                       |               |                      |               |              |               |
| P       | 307                 | 0.695 ± 0.022 | 192                   | 0.800 ± 0.026 | 180                  | 0.818 ± 0.026 | 679          | 0.753 ± 0.014 |
| A       | 135                 | 0.305 ± 0.022 | 48                    | 0.200 ± 0.026 | 40                   | 0.182 ± 0.026 | 223          | 0.247 ± 0.014 |
|         |                     |               |                       |               |                      |               |              |               |

\*A/P denotes Absence/Presence of the restriction site.

Test for Hardy-Weinberg equilibrium:

- Group 1: Chi-square = 0.263, df = 1, p = 0.6081
- Group 2: Chi-square = 2.552, df = 1, p = 0.1102
- Group 3: Chi-square = 0.764, df = 1, p = 0.3821

**Table 3a: Absolute (Abs) and relative (Rel) genotypic frequencies  $\pm$  standard errors (SE) of APOA4-HincII-RelLP 1033 A>G polymorphism for three age groups in females.**

|           | Age Group            |               |                       |               |                     |               |              |               |
|-----------|----------------------|---------------|-----------------------|---------------|---------------------|---------------|--------------|---------------|
| Genotype* | Group 1 (< 73 years) |               | Group 2 (73-90 years) |               | Group 3 (>90 years) |               | Total sample |               |
|           | Abs                  | Rel ± SE      | Abs                   | Rel ± SE      | Abs                 | Rel ± SE      | Abs          | Rel ± SE      |
|           |                      |               |                       |               |                     |               |              |               |
| PP        | 241                  | 0.730 ± 0.024 | 84                    | 0.808 ± 0.039 | 63                  | 0.724 ± 0.048 | 388          | 0.745 ± 0.019 |
| AP        | 84                   | 0.255 ± 0.024 | 18                    | 0.173 ± 0.037 | 23                  | 0.264 ± 0.047 | 125          | 0.240 ± 0.019 |
| AA        | 5                    | 0.015 ± 0.007 | 2                     | 0.019 ± 0.013 | 1                   | 0.011 ± 0.011 | 8            | 0.015 ± 0.005 |
|           |                      |               |                       |               |                     |               |              |               |

\*A/P denotes Absence/Presence of the restriction site.

**Table 3b: Absolute (Abs) and relative (Rel) allelic frequencies  $\pm$  standard errors (SE) of APOA4-HincII-RelLP 1033 A>G polymorphism for three age groups in females.**

|         | Age Group            |               |                       |               |                     |               |              |               |
|---------|----------------------|---------------|-----------------------|---------------|---------------------|---------------|--------------|---------------|
| Allele* | Group 1 (< 73 years) |               | Group 2 (73-90 years) |               | Group 3 (>90 years) |               | Total sample |               |
|         | Abs                  | Rel ± SE      | Abs                   | Rel ± SE      | Abs                 | Rel ± SE      | Abs          | Rel ± SE      |
|         |                      |               |                       |               |                     |               |              |               |
| P       | 566                  | 0.858 ± 0.014 | 186                   | 0.894 ± 0.021 | 149                 | 0.856 ± 0.027 | 901          | 0.865 ± 0.011 |
| A       | 94                   | 0.142 ± 0.014 | 22                    | 0.106 ± 0.021 | 25                  | 0.144 ± 0.027 | 141          | 0.135 ± 0.011 |
|         |                      |               |                       |               |                     |               |              |               |

\*A/P denotes Absence/Presence of the restriction site.

Test for Hardy-Weinberg equilibrium:

- Group 1: Chi-square = 0.583, df = 1, p = 0.4451
- Group 2: Chi-square = 0.752, df = 1, p = 0.3858
- Group 3: Chi-square = 0.481, df = 1, p = 0.4880

**Table 4a: Absolute (Abs) and relative (Rel) genotypic frequencies  $\pm$  standard errors (SE) of APOA4-HincII-RelLP 1033 A>G polymorphism for three age groups in males.**

|           | Age Group           |               |                       |               |                      |               |              |               |
|-----------|---------------------|---------------|-----------------------|---------------|----------------------|---------------|--------------|---------------|
| Genotype* | Group 1 (<66 years) |               | Group 2 (66-87 years) |               | Group 3 (> 87 years) |               | Total sample |               |
|           | Abs                 | Rel ± SE      | Abs                   | Rel ± SE      | Abs                  | Rel ± SE      | Abs          | Rel ± SE      |
|           |                     |               |                       |               |                      |               |              |               |
| PP        | 158                 | 0.715 ± 0.030 | 88                    | 0.733 ± 0.040 | 42                   | 0.382 ± 0.046 | 288          | 0.639 ± 0.023 |
| AP        | 61                  | 0.276 ± 0.030 | 30                    | 0.250 ± 0.040 | 53                   | 0.482 ± 0.048 | 144          | 0.319 ± 0.022 |
| AA        | 2                   | 0.009 ± 0.006 | 2                     | 0.017 ± 0.012 | 15                   | 0.136 ± 0.033 | 19           | 0.042 ± 0.009 |
|           |                     |               |                       |               |                      |               |              |               |

\*A/P denotes Absence/Presence of the restriction site.

**Table 4b: Absolute (Abs) and relative (Rel) allelic frequencies  $\pm$  standard errors (SE) of APOA4-HincII-RelLP 1033 A>G polymorphism for three age groups in males.**

|         | Age Group           |               |                       |               |                      |               |              |               |
|---------|---------------------|---------------|-----------------------|---------------|----------------------|---------------|--------------|---------------|
| Allele* | Group 1 (<66 years) |               | Group 2 (66-87 years) |               | Group 3 (> 87 years) |               | Total sample |               |
|         | Abs                 | Rel ± SE      | Abs                   | Rel ± SE      | Abs                  | Rel ± SE      | Abs          | Rel ± SE      |
|         |                     |               |                       |               |                      |               |              |               |
| P       | 377                 | 0.853 ± 0.017 | 206                   | 0.858 ± 0.023 | 137                  | 0.623 ± 0.033 | 720          | 0.798 ± 0.013 |
| A       | 65                  | 0.147 ± 0.017 | 34                    | 0.142 ± 0.023 | 83                   | 0.377 ± 0.033 | 182          | 0.202 ± 0.013 |
|         |                     |               |                       |               |                      |               |              |               |

\*A/P denotes Absence/Presence of the restriction site.

Test for Hardy-Weinberg equilibrium:

- Group 1: Chi-square = 2.222, df = 1, p = 0.1361
- Group 2: Chi-square = 0.094, df = 1, p = 0.7592
- Group 3: Chi-square = 0.071, df = 1, p = 0.7899

**Table 5a: Absolute (Abs) and relative (Rel) genotypic frequencies  $\pm$  standard errors (SE) of 3'APOB-VNTR polymorphism for three age groups in females.**

|           | Age Group            |               |                       |               |                     |               |              |               |
|-----------|----------------------|---------------|-----------------------|---------------|---------------------|---------------|--------------|---------------|
| Genotype* | Group 1 (< 73 years) |               | Group 2 (73-90 years) |               | Group 3 (>90 years) |               | Total sample |               |
|           | Abs                  | Rel ± SE      | Abs                   | Rel ± SE      | Abs                 | Rel ± SE      | Abs          | Rel ± SE      |
|           |                      |               |                       |               |                     |               |              |               |
| SS        | 15                   | 0.045 ± 0.011 | 4                     | 0.038 ± 0.019 | 1                   | 0.011 ± 0.011 | 20           | 0.038 ± 0.008 |
| SM        | 83                   | 0.252 ± 0.024 | 25                    | 0.240 ± 0.042 | 18                  | 0.207 ± 0.043 | 126          | 0.242 ± 0.019 |
| SL        | 18                   | 0.055 ± 0.013 | 6                     | 0.058 ± 0.023 | 6                   | 0.069 ± 0.027 | 30           | 0.058 ± 0.010 |
| MM        | 135                  | 0.409 ± 0.027 | 50                    | 0.481 ± 0.049 | 39                  | 0.448 ± 0.053 | 224          | 0.430 ± 0.022 |
| ML        | 67                   | 0.203 ± 0.022 | 16                    | 0.154 ± 0.035 | 21                  | 0.241 ± 0.046 | 104          | 0.200 ± 0.018 |
| LL        | 12                   | 0.036 ± 0.010 | 3                     | 0.029 ± 0.016 | 2                   | 0.023 ± 0.016 | 17           | 0.033 ± 0.008 |
|           |                      |               |                       |               |                     |               |              |               |

\*Alleles: S < 35 repeats; M 35–39 repeats; L > 39 repeats.

**Table 5b: Absolute (Abs) and relative (Rel) allelic frequencies  $\pm$  standard errors (SE) of 3'APOB-VNTR polymorphism for three age groups in females.**

|         | Age Group            |               |                       |               |                     |               |              |               |
|---------|----------------------|---------------|-----------------------|---------------|---------------------|---------------|--------------|---------------|
| Allele* | Group 1 (< 73 years) |               | Group 2 (73-90 years) |               | Group 3 (>90 years) |               | Total sample |               |
|         | Abs                  | Rel ± SE      | Abs                   | Rel ± SE      | Abs                 | Rel ± SE      | Abs          | Rel ± SE      |
|         |                      |               |                       |               |                     |               |              |               |
| S       | 131                  | 0.198 ± 0.016 | 39                    | 0.188 ± 0.027 | 26                  | 0.149 ± 0.027 | 196          | 0.188 ± 0.012 |
| M       | 420                  | 0.636 ± 0.019 | 141                   | 0.678 ± 0.032 | 117                 | 0.672 ± 0.036 | 678          | 0.651 ± 0.015 |
| L       | 109                  | 0.165 ± 0.014 | 28                    | 0.135 ± 0.024 | 31                  | 0.178 ± 0.029 | 168          | 0.161 ± 0.011 |
|         |                      |               |                       |               |                     |               |              |               |

\*Alleles: S < 35 repeats; M 35–39 repeats; L > 39 repeats.

Test for Hardy-Weinberg equilibrium:

- Group 1: Chi-square = 2.014, df = 3, p = 0.5695
- Group 2: Chi-square = 1.448, df = 3, p = 0.6943
- Group 3: Chi-square = 1.091, df = 3, p = 0.7792

**Table 6a: Absolute (Abs) and relative (Rel) genotypic frequencies  $\pm$  standard errors (SE) of 3'APOB-VNTR polymorphism for three age groups in males.**

|           | Age Group           |               |                       |               |                      |               |              |               |
|-----------|---------------------|---------------|-----------------------|---------------|----------------------|---------------|--------------|---------------|
| Genotype* | Group 1 (<66 years) |               | Group 2 (66-87 years) |               | Group 3 (> 87 years) |               | Total sample |               |
|           | Abs                 | Rel ± SE      | Abs                   | Rel ± SE      | Abs                  | Rel ± SE      | Abs          | Rel ± SE      |
|           |                     |               |                       |               |                      |               |              |               |
| SS        | 11                  | 0.050 ± 0.015 | 3                     | 0.025 ± 0.014 | 7                    | 0.064 ± 0.023 | 21           | 0.047 ± 0.010 |
| SM        | 58                  | 0.262 ± 0.030 | 27                    | 0.225 ± 0.038 | 33                   | 0.300 ± 0.044 | 118          | 0.262 ± 0.021 |
| SL        | 8                   | 0.036 ± 0.013 | 7                     | 0.058 ± 0.021 | 6                    | 0.055 ± 0.022 | 21           | 0.047 ± 0.010 |
| MM        | 84                  | 0.380 ± 0.033 | 47                    | 0.392 ± 0.045 | 33                   | 0.300 ± 0.044 | 164          | 0.364 ± 0.023 |
| ML        | 52                  | 0.235 ± 0.029 | 28                    | 0.233 ± 0.039 | 28                   | 0.255 ± 0.042 | 108          | 0.239 ± 0.020 |
| LL        | 8                   | 0.036 ± 0.013 | 8                     | 0.067 ± 0.023 | 3                    | 0.027 ± 0.016 | 19           | 0.042 ± 0.009 |
|           |                     |               |                       |               |                      |               |              |               |

\*Alleles: S < 35 repeats; M 35–39 repeats; L > 39 repeats.

**Table 6b: Absolute (Abs) and relative (Rel) allelic frequencies  $\pm$  standard errors (SE) of 3'APOB-VNTR polymorphism for three age groups in males.**

|         | Age Group           |               |                       |               |                      |               |              |               |
|---------|---------------------|---------------|-----------------------|---------------|----------------------|---------------|--------------|---------------|
| Allele* | Group 1 (<66 years) |               | Group 2 (66-87 years) |               | Group 3 (> 87 years) |               | Total sample |               |
|         | Abs                 | Rel ± SE      | Abs                   | Rel ± SE      | Abs                  | Rel ± SE      | Abs          | Rel ± SE      |
|         |                     |               |                       |               |                      |               |              |               |
| S       | 88                  | 0.199 ± 0.019 | 40                    | 0.167 ± 0.024 | 53                   | 0.241 ± 0.029 | 181          | 0.201 ± 0.013 |
| M       | 278                 | 0.629 ± 0.023 | 149                   | 0.621 ± 0.031 | 127                  | 0.577 ± 0.033 | 554          | 0.614 ± 0.016 |
| L       | 76                  | 0.172 ± 0.018 | 51                    | 0.213 ± 0.026 | 40                   | 0.182 ± 0.026 | 167          | 0.185 ± 0.013 |
|         |                     |               |                       |               |                      |               |              |               |

\*Alleles: S < 35 repeats; M 35–39 repeats; L > 39 repeats.

Test for Hardy-Weinberg equilibrium:

- Group 1: Chi-square = 4.893, df = 3, p = 0.1798
- Group 2: Chi-square = 2.152, df = 3, p = 0.5415
- Group 3: Chi-square = 3.140, df = 3, p = 0.3705

**Table 7a: Absolute (Abs) and relative (Rel) genotypic frequencies  $\pm$  standard errors (SE) of APOE  $\epsilon$ 2,  $\epsilon$ 3,  $\epsilon$ 4 alleles for three age groups in females.**

|          | Age Group            |               |                       |               |                     |               |              |               |
|----------|----------------------|---------------|-----------------------|---------------|---------------------|---------------|--------------|---------------|
| Genotype | Group 1 (< 73 years) |               | Group 2 (73-90 years) |               | Group 3 (>90 years) |               | Total sample |               |
|          | Abs                  | Rel ± SE      | Abs                   | Rel ± SE      | Abs                 | Rel ± SE      | Abs          | Rel ± SE      |
|          |                      |               |                       |               |                     |               |              |               |
| ε2 ε2    | 2                    | 0.006 ± 0.004 | 0                     | 0.000         | 1                   | 0.011 ± 0.011 | 3            | 0.006 ± 0.003 |
| ε2 ε3    | 36                   | 0.109 ± 0.017 | 10                    | 0.096 ± 0.029 | 14                  | 0.161 ± 0.039 | 60           | 0.115 ± 0.014 |
| ε2 ε4    | 6                    | 0.018 ± 0.007 | 1                     | 0.010 ± 0.010 | 1                   | 0.011 ± 0.011 | 8            | 0.015 ± 0.005 |
| ε3 ε3    | 234                  | 0.709 ± 0.025 | 78                    | 0.750 ± 0.042 | 67                  | 0.770 ± 0.045 | 379          | 0.727 ± 0.020 |
| ε3 ε4    | 47                   | 0.142 ± 0.019 | 15                    | 0.144 ± 0.034 | 4                   | 0.046 ± 0.022 | 66           | 0.127 ± 0.015 |
| ε4 ε4    | 5                    | 0.015 ± 0.007 | 0                     | 0.000         | 0                   | 0.000         | 5            | 0.010 ± 0.004 |
|          |                      |               |                       |               |                     |               |              |               |

**Table 7b: Absolute (Abs) and relative (Rel) allelic frequencies  $\pm$  standard errors (SE) of APOE  $\epsilon$ 2,  $\epsilon$ 3,  $\epsilon$ 4 alleles for three age groups in females.**

|        | Age Group            |               |                       |               |                     |               |              |               |
|--------|----------------------|---------------|-----------------------|---------------|---------------------|---------------|--------------|---------------|
| Allele | Group 1 (< 73 years) |               | Group 2 (73-90 years) |               | Group 3 (>90 years) |               | Total sample |               |
|        | Abs                  | Rel ± SE      | Abs                   | Rel ± SE      | Abs                 | Rel ± SE      | Abs          | Rel ± SE      |
|        |                      |               |                       |               |                     |               |              |               |
| ε2     | 46                   | 0.070 ± 0.010 | 11                    | 0.053 ± 0.016 | 17                  | 0.098 ± 0.023 | 74           | 0.071 ± 0.008 |
| ε3     | 551                  | 0.835 ± 0.014 | 181                   | 0.870 ± 0.023 | 152                 | 0.874 ± 0.025 | 884          | 0.848 ± 0.011 |
| ε4     | 63                   | 0.095 ± 0.011 | 16                    | 0.077 ± 0.018 | 5                   | 0.029 ± 0.013 | 84           | 0.081 ± 0.008 |
|        |                      |               |                       |               |                     |               |              |               |

Test for Hardy-Weinberg equilibrium:

- Group 1: Chi-square =2.824, df = 3, p = 0.4196
- Group 2: Chi-square =1.044, df = 3, p = 0.7906
- Group 3: Chi-square =0.727, df = 3, p = 0.8668

**Table 8a: Absolute (Abs) and relative (Rel) genotypic frequencies  $\pm$  standard errors (SE) of APOE  $\epsilon$ 2,  $\epsilon$ 3,  $\epsilon$ 4 alleles for three age groups in males.**

|          | Age Group           |               |                       |               |                      |               |              |               |
|----------|---------------------|---------------|-----------------------|---------------|----------------------|---------------|--------------|---------------|
| Genotype | Group 1 (<66 years) |               | Group 2 (66-87 years) |               | Group 3 (> 87 years) |               | Total sample |               |
|          | Abs                 | Rel ± SE      | Abs                   | Rel ± SE      | Abs                  | Rel ± SE      | Abs          | Rel ± SE      |
|          |                     |               |                       |               |                      |               |              |               |
| ε2 ε2    | 0                   | 0.000         | 0                     | 0.000         | 0                    | 0.000         | 0            | 0.000         |
| ε2 ε3    | 26                  | 0.118 ± 0.022 | 21                    | 0.175 ± 0.035 | 19                   | 0.173 ± 0.036 | 66           | 0.146 ± 0.017 |
| ε2 ε4    | 9                   | 0.041 ± 0.013 | 5                     | 0.042 ± 0.018 | 1                    | 0.009 ± 0.009 | 15           | 0.033 ± 0.008 |
| ε3 ε3    | 145                 | 0.656 ± 0.032 | 77                    | 0.642 ± 0.044 | 78                   | 0.709 ± 0.043 | 300          | 0.665 ± 0.022 |
| ε3 ε4    | 40                  | 0.181 ± 0.026 | 17                    | 0.142 ± 0.032 | 12                   | 0.109 ± 0.030 | 69           | 0.153 ± 0.017 |
| ε4 ε4    | 1                   | 0.005 ± 0.005 | 0                     | 0.000         | 0                    | 0.000         | 1            | 0.002 ± 0.002 |
|          |                     |               |                       |               |                      |               |              |               |

**Table 8b: Absolute (Abs) and relative (Rel) allelic frequencies  $\pm$  standard errors (SE) of APOE  $\epsilon$ 2,  $\epsilon$ 3,  $\epsilon$ 4 alleles for three age groups in males.**

|        | Age Group           |               |                       |               |                      |               |              |               |
|--------|---------------------|---------------|-----------------------|---------------|----------------------|---------------|--------------|---------------|
| Allele | Group 1 (<66 years) |               | Group 2 (66-87 years) |               | Group 3 (> 87 years) |               | Total sample |               |
|        | Abs                 | Rel ± SE      | Abs                   | Rel ± SE      | Abs                  | Rel ± SE      | Abs          | Rel ± SE      |
|        |                     |               |                       |               |                      |               |              |               |
| ε2     | 35                  | 0.079 ± 0.013 | 26                    | 0.108 ± 0.020 | 20                   | 0.091 ± 0.019 | 81           | 0.090 ± 0.010 |
| ε3     | 356                 | 0.805 ± 0.019 | 192                   | 0.800 ± 0.026 | 187                  | 0.850 ± 0.024 | 735          | 0.815 ± 0.013 |
| ε4     | 51                  | 0.115 ± 0.015 | 22                    | 0.092 ± 0.019 | 13                   | 0.059 ± 0.016 | 86           | 0.095 ± 0.010 |
|        |                     |               |                       |               |                      |               |              |               |

Test for Hardy-Weinberg equilibrium:

- Group 1: Chi-square = 8.981, df = 3, p = 0.0295
- Group 2: Chi-square = 5.312, df = 3, p = 0.1503
- Group 3: Chi-square = 1.665, df = 3, p = 0.6447



**Table 9a: Absolute (Abs) and relative (Rel) genotypic frequencies  $\pm$  standard errors (SE) of HSP70-1 - 110A/C polymorphism for three age groups in females.**

|          | Age Group            |               |                       |               |                     |               |              |               |
|----------|----------------------|---------------|-----------------------|---------------|---------------------|---------------|--------------|---------------|
| Genotype | Group 1 (< 73 years) |               | Group 2 (73-90 years) |               | Group 3 (>90 years) |               | Total sample |               |
|          | Abs                  | Rel ± SE      | Abs                   | Rel ± SE      | Abs                 | Rel ± SE      | Abs          | Rel ± SE      |
|          |                      |               |                       |               |                     |               |              |               |
| AA       | 141                  | 0.427 ± 0.027 | 30                    | 0.288 ± 0.044 | 28                  | 0.322 ± 0.050 | 199          | 0.382 ± 0.021 |
| AC       | 152                  | 0.461 ± 0.027 | 60                    | 0.577 ± 0.048 | 45                  | 0.517 ± 0.054 | 257          | 0.493 ± 0.022 |
| CC       | 37                   | 0.112 ± 0.017 | 14                    | 0.135 ± 0.033 | 14                  | 0.161 ± 0.039 | 65           | 0.125 ± 0.014 |
|          |                      |               |                       |               |                     |               |              |               |

**Table 9b: Absolute (Abs) and relative (Rel) genotypic frequencies  $\pm$  standard errors (SE) of HSP70-1 - 110A/C polymorphism for three age groups in females.**

|        | Age Group            |               |                       |               |                     |               |              |               |
|--------|----------------------|---------------|-----------------------|---------------|---------------------|---------------|--------------|---------------|
| Allele | Group 1 (< 73 years) |               | Group 2 (73-90 years) |               | Group 3 (>90 years) |               | Total sample |               |
|        | Abs                  | Rel ± SE      | Abs                   | Rel ± SE      | Abs                 | Rel ± SE      | Abs          | Rel ± SE      |
|        |                      |               |                       |               |                     |               |              |               |
| A      | 434                  | 0.658 ± 0.018 | 120                   | 0.577 ± 0.034 | 101                 | 0.580 ± 0.037 | 655          | 0.629 ± 0.015 |
| C      | 226                  | 0.342 ± 0.018 | 88                    | 0.423 ± 0.034 | 73                  | 0.420 ± 0.037 | 387          | 0.371 ± 0.015 |
|        |                      |               |                       |               |                     |               |              |               |

Test for Hardy-Weinberg equilibrium:

- Group 1: Chi-square = 0.171, df = 1, p = 0.6792
- Group 2: Chi-square = 3.438, df = 1, p = 0.0637
- Group 3: Chi-square = 0.334, df = 1, p = 0.5633

**Table 10a: Absolute (Abs) and relative (Rel) genotypic frequencies  $\pm$  standard errors (SE) of HSP70-1-110A/C polymorphism for three age groups in males.**

|          | Age Group           |               |                       |               |                      |               |              |               |
|----------|---------------------|---------------|-----------------------|---------------|----------------------|---------------|--------------|---------------|
| Genotype | Group 1 (<66 years) |               | Group 2 (66-87 years) |               | Group 3 (> 87 years) |               | Total sample |               |
|          | Abs                 | Rel ± SE      | Abs                   | Rel ± SE      | Abs                  | Rel ± SE      | Abs          | Rel ± SE      |
|          |                     |               |                       |               |                      |               |              |               |
| AA       | 84                  | 0.380 ± 0.033 | 45                    | 0.375 ± 0.044 | 40                   | 0.364 ± 0.046 | 169          | 0.375 ± 0.023 |
| AC       | 99                  | 0.448 ± 0.033 | 62                    | 0.517 ± 0.046 | 54                   | 0.491 ± 0.048 | 215          | 0.477 ± 0.024 |
| CC       | 38                  | 0.172 ± 0.025 | 13                    | 0.108 ± 0.028 | 16                   | 0.145 ± 0.034 | 67           | 0.149 ± 0.017 |
|          |                     |               |                       |               |                      |               |              |               |

**Table 10b: Absolute (Abs) and relative (Rel) genotypic frequencies  $\pm$  standard errors (SE) of HSP70-1-110A/C polymorphism for three age groups in males.**

|        | Age Group           |               |                       |               |                      |               |              |               |
|--------|---------------------|---------------|-----------------------|---------------|----------------------|---------------|--------------|---------------|
| Allele | Group 1 (<66 years) |               | Group 2 (66-87 years) |               | Group 3 (> 87 years) |               | Total sample |               |
|        | Abs                 | Rel ± SE      | Abs                   | Rel ± SE      | Abs                  | Rel ± SE      | Abs          | Rel ± SE      |
|        |                     |               |                       |               |                      |               |              |               |
| A      | 267                 | 0.604 ± 0.023 | 152                   | 0.633 ± 0.031 | 134                  | 0.609 ± 0.033 | 553          | 0.613 ± 0.016 |
| C      | 175                 | 0.396 ± 0.023 | 88                    | 0.367 ± 0.031 | 86                   | 0.391 ± 0.033 | 349          | 0.387 ± 0.016 |
|        |                     |               |                       |               |                      |               |              |               |

Test for Hardy-Weinberg equilibrium:

- Group 1: Chi-square = 0.891, df = 1, p = 0.3452
- Group 2: Chi-square = 1.517, df = 1, p = 0.2181
- Group 3: Chi-square = 0.105, df = 1, p = 0.7459

**Table 11a: Absolute (Abs) and relative(Rel) genotypic frequencies  $\pm$  standard errors (SE) of HSP90- $\alpha$ -HinfI-RelLP 888 C>T polymorphism for three age groups in females.**

|           | Age Group            |               |                       |               |                     |               |              |               |
|-----------|----------------------|---------------|-----------------------|---------------|---------------------|---------------|--------------|---------------|
| Genotype* | Group 1 (< 73 years) |               | Group 2 (73-90 years) |               | Group 3 (>90 years) |               | Total sample |               |
|           | Abs                  | Rel ± SE      | Abs                   | Rel ± SE      | Abs                 | Rel ± SE      | Abs          | Rel ± SE      |
|           |                      |               |                       |               |                     |               |              |               |
| PP        | 253                  | 0.767 ± 0.023 | 75                    | 0.721 ± 0.044 | 71                  | 0.816 ± 0.042 | 399          | 0.766 ± 0.019 |
| AP        | 73                   | 0.221 ± 0.023 | 28                    | 0.269 ± 0.043 | 15                  | 0.172 ± 0.040 | 116          | 0.223 ± 0.018 |
| AA        | 4                    | 0.012 ± 0.006 | 1                     | 0.010 ± 0.010 | 1                   | 0.011 ± 0.011 | 6            | 0.012 ± 0.005 |
|           |                      |               |                       |               |                     |               |              |               |

\*A/P denotes Absence/Presence of the restriction site.

**Table 11b: Absolute (Abs) and relative (Rel) allelic frequencies  $\pm$  standard errors (SE) of HSP90- $\alpha$ -HinfI-RelLP 888 C>T polymorphism for three age groups in females.**

|         | Age Group            |               |                       |               |                     |               |              |               |
|---------|----------------------|---------------|-----------------------|---------------|---------------------|---------------|--------------|---------------|
| Allele* | Group 1 (< 73 years) |               | Group 2 (73-90 years) |               | Group 3 (>90 years) |               | Total sample |               |
|         | Abs                  | Rel ± SE      | Abs                   | Rel ± SE      | Abs                 | Rel ± SE      | Abs          | Rel ± SE      |
|         |                      |               |                       |               |                     |               |              |               |
| P       | 579                  | 0.877 ± 0.013 | 178                   | 0.856 ± 0.024 | 157                 | 0.902 ± 0.023 | 914          | 0.877 ± 0.010 |
| A       | 81                   | 0.123 ± 0.013 | 30                    | 0.144 ± 0.024 | 17                  | 0.098 ± 0.023 | 128          | 0.123 ± 0.010 |
|         |                      |               |                       |               |                     |               |              |               |

\*A/P denotes Absence/Presence of the restriction site.

Test for Hardy-Weinberg equilibrium:

- Group 1: Chi-square = 0.246, df = 1, p = 0.6199
- Group 2: Chi-square = 0.854, df = 1, p = 0.3544
- Group 3: Chi-square = 0.043, df = 1, p = 0.8357

**Table 12a: Absolute (Abs) and relative(Rel) genotypic frequencies  $\pm$  standard errors (SE) of HSP90- $\alpha$ -HinfI-RelLP 888 C>T polymorphism for three age groups in males.**

|           | Age Group           |               |                       |               |                      |               |              |               |
|-----------|---------------------|---------------|-----------------------|---------------|----------------------|---------------|--------------|---------------|
| Genotype* | Group 1 (<66 years) |               | Group 2 (66-87 years) |               | Group 3 (> 87 years) |               | Total sample |               |
|           | Abs                 | Rel ± SE      | Abs                   | Rel ± SE      | Abs                  | Rel ± SE      | Abs          | Rel ± SE      |
|           |                     |               |                       |               |                      |               |              |               |
| PP        | 167                 | 0.756 ± 0.029 | 96                    | 0.800 ± 0.037 | 91                   | 0.827 ± 0.036 | 354          | 0.785 ± 0.019 |
| AP        | 53                  | 0.240 ± 0.029 | 24                    | 0.200 ± 0.037 | 19                   | 0.173 ± 0.036 | 96           | 0.213 ± 0.019 |
| AA        | 1                   | 0.005 ± 0.005 | 0                     | 0.000         | 0                    | 0.000         | 1            | 0.002 ± 0.002 |
|           |                     |               |                       |               |                      |               |              |               |

\*A/P denotes Absence/Presence of the restriction site.

**Table 12b: Absolute (Abs) and relative (Rel) allelic frequencies  $\pm$  standard errors (SE) of HSP90- $\alpha$ -HinfI-RelLP 888 C>T polymorphism for three age groups in males.**

|         | Age Group           |               |                       |               |                      |               |              |               |
|---------|---------------------|---------------|-----------------------|---------------|----------------------|---------------|--------------|---------------|
| Allele* | Group 1 (<66 years) |               | Group 2 (66-87 years) |               | Group 3 (> 87 years) |               | Total sample |               |
|         | Abs                 | Rel ± SE      | Abs                   | Rel ± SE      | Abs                  | Rel ± SE      | Abs          | Rel ± SE      |
|         |                     |               |                       |               |                      |               |              |               |
| P       | 387                 | 0.876 ± 0.016 | 216                   | 0.900 ± 0.019 | 201                  | 0.914 ± 0.019 | 804          | 0.891 ± 0.010 |
| A       | 55                  | 0.124 ± 0.016 | 24                    | 0.100 ± 0.019 | 19                   | 0.086 ± 0.019 | 98           | 0.109 ± 0.010 |
|         |                     |               |                       |               |                      |               |              |               |

\*A/P denotes Absence/Presence of the restriction site.

Test for Hardy-Weinberg equilibrium:

- Group 1: Chi-square =2.236, df = 1, p = 0.1348
- Group 2: Chi-square =1.481, df = 1, p = 0.2236
- Group 3: Chi-square =0.983, df = 1, p = 0.3215

**Table 13a: Absolute (Abs) and relative (Rel) genotypic frequencies  $\pm$  standard errors (SE) of HSP90-Beta 5976 A>C polymorphism for three age groups in females.**

|          | Age Group            |               |                       |               |                     |               |              |               |
|----------|----------------------|---------------|-----------------------|---------------|---------------------|---------------|--------------|---------------|
| Genotype | Group 1 (< 73 years) |               | Group 2 (73-90 years) |               | Group 3 (>90 years) |               | Total sample |               |
|          | Abs                  | Rel ± SE      | Abs                   | Rel ± SE      | Abs                 | Rel ± SE      | Abs          | Rel ± SE      |
|          |                      |               |                       |               |                     |               |              |               |
| AA       | 238                  | 0.721 ± 0.025 | 77                    | 0.740 ± 0.043 | 74                  | 0.851 ± 0.038 | 389          | 0.747 ± 0.019 |
| AC       | 86                   | 0.261 ± 0.024 | 24                    | 0.231 ± 0.041 | 11                  | 0.126 ± 0.036 | 121          | 0.232 ± 0.018 |
| CC       | 6                    | 0.018 ± 0.007 | 3                     | 0.029 ± 0.016 | 2                   | 0.023 ± 0.016 | 11           | 0.021 ± 0.006 |
|          |                      |               |                       |               |                     |               |              |               |

**Table 13b: Absolute (Abs) and relative (Rel) allelic frequencies  $\pm$  standard errors (SE) of HSP90-Beta 5976 A>C polymorphism for three age groups in females.**

|        | Age Group            |               |                       |               |                     |               |              |               |
|--------|----------------------|---------------|-----------------------|---------------|---------------------|---------------|--------------|---------------|
| Allele | Group 1 (< 73 years) |               | Group 2 (73-90 years) |               | Group 3 (>90 years) |               | Total sample |               |
|        | Abs                  | Rel ± SE      | Abs                   | Rel ± SE      | Abs                 | Rel ± SE      | Abs          | Rel ± SE      |
|        |                      |               |                       |               |                     |               |              |               |
| A      | 562                  | 0.852 ± 0.014 | 178                   | 0.856 ± 0.024 | 159                 | 0.914 ± 0.021 | 899          | 0.863 ± 0.011 |
| C      | 98                   | 0.148 ± 0.014 | 30                    | 0.144 ± 0.024 | 15                  | 0.086 ± 0.021 | 143          | 0.137 ± 0.011 |
|        |                      |               |                       |               |                     |               |              |               |

Test for Hardy-Weinberg equilibrium:

- Group 1: Chi-square = 0.309, df = 1, p = 0.5783
- Group 2: Chi-square = 0.442, df = 1, p = 0.5062
- Group 3: Chi-square = 3.393, df = 1, p = 0.0655

**Table 14a: Absolute (Abs) and relative (Rel) genotypic frequencies  $\pm$  standard errors (SE) of HSP90-Beta 5976 A>C polymorphism for three age groups in males.**

|          | Age Group           |               |                       |               |                      |               |              |               |
|----------|---------------------|---------------|-----------------------|---------------|----------------------|---------------|--------------|---------------|
| Genotype | Group 1 (<66 years) |               | Group 2 (66-87 years) |               | Group 3 (> 87 years) |               | Total sample |               |
|          | Abs                 | Rel ± SE      | Abs                   | Rel ± SE      | Abs                  | Rel ± SE      | Abs          | Rel ± SE      |
|          |                     |               |                       |               |                      |               |              |               |
| AA       | 167                 | 0.756 ± 0.029 | 92                    | 0.767 ± 0.039 | 77                   | 0.700 ± 0.044 | 336          | 0.745 ± 0.021 |
| AC       | 52                  | 0.235 ± 0.029 | 23                    | 0.192 ± 0.036 | 33                   | 0.300 ± 0.044 | 108          | 0.239 ± 0.020 |
| CC       | 2                   | 0.009 ± 0.006 | 5                     | 0.042 ± 0.018 | 0                    | 0.000         | 7            | 0.016 ± 0.006 |
|          |                     |               |                       |               |                      |               |              |               |

**Table 14b: Absolute (Abs) and relative (Rel) allelic frequencies  $\pm$  standard errors (SE) of HSP90-Beta 5976 A>C polymorphism for three age groups in males.**

|        | Age Group           |               |                       |               |                      |               |              |               |
|--------|---------------------|---------------|-----------------------|---------------|----------------------|---------------|--------------|---------------|
| Allele | Group 1 (<66 years) |               | Group 2 (66-87 years) |               | Group 3 (> 87 years) |               | Total sample |               |
|        | Abs                 | Rel ± SE      | Abs                   | Rel ± SE      | Abs                  | Rel ± SE      | Abs          | Rel ± SE      |
|        |                     |               |                       |               |                      |               |              |               |
| A      | 386                 | 0.873 ± 0.016 | 207                   | 0.863 ± 0.022 | 187                  | 0.850 ± 0.024 | 780          | 0.865 ± 0.011 |
| C      | 56                  | 0.127 ± 0.016 | 33                    | 0.138 ± 0.022 | 33                   | 0.150 ± 0.024 | 122          | 0.135 ± 0.011 |
|        |                     |               |                       |               |                      |               |              |               |

Test for Hardy-Weinberg equilibrium:

- Group 1: Chi-square = 0.885, df = 1, p = 0.3468
- Group 2: Chi-square = 4.420, df = 1, p = 0.0355
- Group 3: Chi-square = 3.426, df = 1, p = 0.0642

**Table 15a: Absolute (Abs) and relative (Rel) genotypic frequencies  $\pm$  standard errors (SE) of SIRT3 VNTR intron 5 polymorphism for three age groups in females.**

|           | Age Group            |               |                       |               |                     |               |              |               |
|-----------|----------------------|---------------|-----------------------|---------------|---------------------|---------------|--------------|---------------|
| Genotype* | Group 1 (< 73 years) |               | Group 2 (73-90 years) |               | Group 3 (>90 years) |               | Total sample |               |
|           | Abs                  | Rel ± SE      | Abs                   | Rel ± SE      | Abs                 | Rel ± SE      | Abs          | Rel ± SE      |
|           |                      |               |                       |               |                     |               |              |               |
| 1 1       | 65                   | 0.197 ± 0.022 | 21                    | 0.202 ± 0.039 | 19                  | 0.218 ± 0.044 | 105          | 0.202 ± 0.018 |
| 1 2       | 24                   | 0.073 ± 0.014 | 13                    | 0.125 ± 0.032 | 8                   | 0.092 ± 0.031 | 45           | 0.086 ± 0.012 |
| 1 3       | 62                   | 0.188 ± 0.022 | 15                    | 0.144 ± 0.034 | 14                  | 0.161 ± 0.039 | 91           | 0.175 ± 0.017 |
| 1 4       | 74                   | 0.224 ± 0.023 | 20                    | 0.192 ± 0.039 | 20                  | 0.230 ± 0.045 | 114          | 0.219 ± 0.018 |
| 1 5       | 1                    | 0.003 ± 0.003 | 1                     | 0.010 ± 0.010 | 0                   | 0.000         | 2            | 0.004 ± 0.003 |
| 1 6       | 3                    | 0.009 ± 0.005 | 1                     | 0.010 ± 0.010 | 0                   | 0.000         | 4            | 0.008 ± 0.004 |
| 1 7       | 0                    | 0.000         | 1                     | 0.010 ± 0.010 | 0                   | 0.000         | 1            | 0.002 ± 0.002 |
| 2 2       | 2                    | 0.006 ± 0.004 | 1                     | 0.010 ± 0.010 | 3                   | 0.034 ± 0.020 | 6            | 0.012 ± 0.005 |
| 2 3       | 11                   | 0.033 ± 0.010 | 5                     | 0.048 ± 0.021 | 2                   | 0.023 ± 0.016 | 18           | 0.035 ± 0.008 |
| 2 4       | 17                   | 0.052 ± 0.012 | 4                     | 0.038 ± 0.019 | 1                   | 0.011 ± 0.011 | 22           | 0.042 ± 0.009 |
| 2 5       | 0                    | 0.000         | 1                     | 0.010 ± 0.010 | 0                   | 0.000         | 1            | 0.002 ± 0.002 |
| 2 6       | 0                    | 0.000         | 1                     | 0.010 ± 0.010 | 0                   | 0.000         | 1            | 0.002 ± 0.002 |
| 3 3       | 16                   | 0.048 ± 0.012 | 6                     | 0.058 ± 0.023 | 5                   | 0.057 ± 0.025 | 27           | 0.052 ± 0.010 |
| 3 4       | 28                   | 0.085 ± 0.015 | 7                     | 0.067 ± 0.025 | 7                   | 0.080 ± 0.029 | 42           | 0.081 ± 0.012 |
| 3 5       | 1                    | 0.003 ± 0.003 | 0                     | 0.000         | 0                   | 0.000         | 1            | 0.002 ± 0.002 |
| 3 6       | 0                    | 0.000         | 1                     | 0.010 ± 0.010 | 0                   | 0.000         | 1            | 0.002 ± 0.002 |
| 4 4       | 26                   | 0.079 ± 0.015 | 5                     | 0.048 ± 0.021 | 6                   | 0.069 ± 0.027 | 37           | 0.071 ± 0.001 |
| 4 5       | 0                    | 0.000         | 0                     | 0.000         | 2                   | 0.023 ± 0.016 | 2            | 0.004 ± 0.003 |
| 4 6       | 0                    | 0.000         | 1                     | 0.010 ± 0.010 | 0                   | 0.000         | 1            | 0.002 ± 0.002 |
|           |                      |               |                       |               |                     |               |              |               |

\*Allele nomenclature refers to the repeat number.

**Table 15b: Absolute (Abs) and relative (Rel) allelic frequencies  $\pm$  standard errors (SE) of SIRT3 VNTR intron 5 polymorphism for three age groups in females.**

|         | Age Group            |               |                       |               |                     |               |              |               |
|---------|----------------------|---------------|-----------------------|---------------|---------------------|---------------|--------------|---------------|
| Allele* | Group 1 (< 73 years) |               | Group 2 (73-90 years) |               | Group 3 (>90 years) |               | Total sample |               |
|         | Abs                  | Rel ± SE      | Abs                   | Rel ± SE      | Abs                 | Rel ± SE      | Abs          | Rel ± SE      |
|         |                      |               |                       |               |                     |               |              |               |
| 1       | 294                  | 0.445 ± 0.019 | 93                    | 0.447 ± 0.034 | 80                  | 0.460 ± 0.038 | 467          | 0.448 ± 0.015 |
| 2       | 56                   | 0.085 ± 0.011 | 26                    | 0.125 ± 0.023 | 17                  | 0.098 ± 0.023 | 99           | 0.095 ± 0.009 |
| 3       | 134                  | 0.203 ± 0.016 | 40                    | 0.192 ± 0.027 | 33                  | 0.190 ± 0.030 | 207          | 0.199 ± 0.012 |
| 4       | 171                  | 0.259 ± 0.017 | 42                    | 0.202 ± 0.028 | 42                  | 0.241 ± 0.032 | 255          | 0.245 ± 0.013 |
| 5       | 2                    | 0.003 ± 0.002 | 2                     | 0.010 ± 0.007 | 2                   | 0.011 ± 0.008 | 6            | 0.006 ± 0.002 |
| 6       | 3                    | 0.005 ± 0.003 | 4                     | 0.019 ± 0.010 | 0                   | 0.000         | 7            | 0.007 ± 0.003 |
| 7       | 0                    | 0.000         | 1                     | 0.005 ± 0.005 | 0                   | 0.000         | 1            | 0.001 ± 0.001 |
|         |                      |               |                       |               |                     |               |              |               |

\*Allele nomenclature refers to the repeat number.

Test for Hardy-Weinberg equilibrium (5000 permutations):

- Group 1:  $p = 0.6672$
- Group 2:  $p = 0.9616$
- Group 3:  $p = 0.1170$

**Table 16a: Absolute (Abs) and relative (Rel) genotypic frequencies  $\pm$  standard errors (SE) of SIRT3 VNTR intron 5 polymorphism for three age groups in males.**

|           | Age Group           |               |                       |               |                      |               |              |               |
|-----------|---------------------|---------------|-----------------------|---------------|----------------------|---------------|--------------|---------------|
| Genotype* | Group 1 (<66 years) |               | Group 2 (66-87 years) |               | Group 3 (> 87 years) |               | Total sample |               |
|           | Abs                 | Rel ± SE      | Abs                   | Rel ± SE      | Abs                  | Rel ± SE      | Abs          | Rel ± SE      |
|           |                     |               |                       |               |                      |               |              |               |
| 1 1       | 33                  | 0.149 ± 0.024 | 16                    | 0.133 ± 0.031 | 18                   | 0.164 ± 0.035 | 67           | 0.149 ± 0.017 |
| 1 2       | 27                  | 0.122 ± 0.022 | 12                    | 0.100 ± 0.027 | 7                    | 0.064 ± 0.023 | 46           | 0.102 ± 0.014 |
| 1 3       | 36                  | 0.163 ± 0.025 | 12                    | 0.100 ± 0.027 | 19                   | 0.173 ± 0.036 | 67           | 0.149 ± 0.017 |
| 1 4       | 48                  | 0.217 ± 0.028 | 28                    | 0.233 ± 0.039 | 27                   | 0.245 ± 0.041 | 103          | 0.228 ± 0.020 |
| 1 5       | 0                   | 0.000         | 1                     | 0.008 ± 0.008 | 1                    | 0.009 ± 0.009 | 2            | 0.004 ± 0.003 |
| 2 2       | 5                   | 0.023 ± 0.010 | 3                     | 0.025 ± 0.014 | 0                    | 0.000         | 8            | 0.018 ± 0.006 |
| 2 3       | 8                   | 0.036 ± 0.013 | 5                     | 0.042 ± 0.018 | 0                    | 0.000         | 13           | 0.029 ± 0.008 |
| 2 4       | 14                  | 0.063 ± 0.016 | 8                     | 0.067 ± 0.023 | 4                    | 0.036 ± 0.018 | 26           | 0.058 ± 0.011 |
| 2 5       | 1                   | 0.005 ± 0.005 | 0                     | 0.000         | 0                    | 0.000         | 1            | 0.002 ± 0.002 |
| 3 3       | 15                  | 0.068 ± 0.017 | 7                     | 0.058 ± 0.021 | 5                    | 0.045 ± 0.020 | 27           | 0.060 ± 0.011 |
| 3 4       | 19                  | 0.086 ± 0.019 | 19                    | 0.158 ± 0.033 | 14                   | 0.127 ± 0.032 | 52           | 0.115 ± 0.015 |
| 3 5       | 1                   | 0.005 ± 0.005 | 0                     | 0.000         | 2                    | 0.018 ± 0.013 | 3            | 0.007 ± 0.004 |
| 4 4       | 13                  | 0.059 ± 0.016 | 9                     | 0.075 ± 0.024 | 11                   | 0.100 ± 0.029 | 33           | 0.073 ± 0.012 |
| 4 5       | 1                   | 0.005 ± 0.005 | 0                     | 0.000         | 1                    | 0.009 ± 0.009 | 2            | 0.004 ± 0.003 |
| 4 6       | 0                   | 0.000         | 0                     | 0.000         | 1                    | 0.009 ± 0.009 | 1            | 0.002 ± 0.002 |
|           |                     |               |                       |               |                      |               |              |               |

\*Allele nomenclature refers to the repeat number.

**Table 16b: Absolute (Abs) and relative (Rel) allelic frequencies  $\pm$  standard errors (SE) of SIRT3 VNTR intron 5 polymorphism for three age groups in males.**

|         | Age Group           |               |                       |               |                      |               |              |               |
|---------|---------------------|---------------|-----------------------|---------------|----------------------|---------------|--------------|---------------|
| Allele* | Group 1 (<66 years) |               | Group 2 (66-87 years) |               | Group 3 (> 87 years) |               | Total sample |               |
|         | Abs                 | Rel ± SE      | Abs                   | Rel ± SE      | Abs                  | Rel ± SE      | Abs          | Rel ± SE      |
|         |                     |               |                       |               |                      |               |              |               |
| 1       | 177                 | 0.400 ± 0.023 | 85                    | 0.354 ± 0.031 | 90                   | 0.409 ± 0.033 | 352          | 0.390 ± 0.016 |
| 2       | 60                  | 0.136 ± 0.016 | 31                    | 0.129 ± 0.022 | 11                   | 0.050 ± 0.015 | 102          | 0.113 ± 0.011 |
| 3       | 94                  | 0.213 ± 0.019 | 50                    | 0.208 ± 0.026 | 45                   | 0.205 ± 0.027 | 189          | 0.210 ± 0.014 |
| 4       | 108                 | 0.244 ± 0.020 | 73                    | 0.304 ± 0.030 | 69                   | 0.314 ± 0.031 | 250          | 0.277 ± 0.015 |
| 5       | 3                   | 0.007 ± 0.004 | 1                     | 0.004 ± 0.004 | 4                    | 0.018 ± 0.009 | 8            | 0.009 ± 0.003 |
| 6       | 0                   | 0.000         | 0                     | 0.000         | 1                    | 0.005 ± 0.005 | 1            | 0.001 ± 0.001 |
|         |                     |               |                       |               |                      |               |              |               |

\*Allele nomenclature refers to the repeat number.

Test for Hardy-Weinberg equilibrium (5000 permutations):

- Group 1:  $p = 0.4848$
- Group 2:  $p = 0.5512$
- Group 3:  $p = 0.4850$



**Table 17a: Absolute (Abs) and relative (Rel) genotypic frequencies  $\pm$  standard errors (SE) of human tyrosine (HUMTHO.1) STR polymorphism for three age groups in females.**

|          | Age Group            |               |                       |               |                     |               |              |               |
|----------|----------------------|---------------|-----------------------|---------------|---------------------|---------------|--------------|---------------|
| Genotype | Group 1 (< 73 years) |               | Group 2 (73-90 years) |               | Group 3 (>90 years) |               | Total sample |               |
|          | Abs                  | Rel ± SE      | Abs                   | Rel ± SE      | Abs                 | Rel ± SE      | Abs          | Rel ± SE      |
|          |                      |               |                       |               |                     |               |              |               |
| 6 6      | 24                   | 0.073 ± 0.014 | 6                     | 0.058 ± 0.023 | 8                   | 0.092 ± 0.031 | 38           | 0.073 ± 0.011 |
| 6 7      | 29                   | 0.088 ± 0.016 | 11                    | 0.106 ± 0.030 | 6                   | 0.069 ± 0.027 | 46           | 0.088 ± 0.012 |
| 6 8      | 35                   | 0.106 ± 0.017 | 3                     | 0.029 ± 0.016 | 9                   | 0.103 ± 0.033 | 47           | 0.090 ± 0.013 |
| 6 9      | 43                   | 0.130 ± 0.019 | 16                    | 0.154 ± 0.035 | 10                  | 0.115 ± 0.034 | 69           | 0.132 ± 0.015 |
| 6 10     | 38                   | 0.115 ± 0.018 | 13                    | 0.125 ± 0.032 | 12                  | 0.138 ± 0.037 | 63           | 0.121 ± 0.014 |
| 6 10*    | 3                    | 0.009 ± 0.005 | 0                     | 0.000         | 0                   | 0.000         | 3            | 0.006 ± 0.003 |
| 7 7      | 7                    | 0.021 ± 0.008 | 2                     | 0.019 ± 0.013 | 3                   | 0.034 ± 0.020 | 12           | 0.023 ± 0.007 |
| 7 8      | 19                   | 0.058 ± 0.013 | 4                     | 0.038 ± 0.019 | 3                   | 0.034 ± 0.020 | 26           | 0.050 ± 0.010 |
| 7 9      | 14                   | 0.042 ± 0.011 | 10                    | 0.096 ± 0.029 | 7                   | 0.080 ± 0.029 | 31           | 0.060 ± 0.010 |
| 7 10     | 26                   | 0.079 ± 0.015 | 5                     | 0.048 ± 0.021 | 3                   | 0.034 ± 0.020 | 34           | 0.065 ± 0.011 |
| 7 10*    | 0                    | 0.000         | 0                     | 0.000         | 1                   | 0.011 ± 0.011 | 1            | 0.002 ± 0.002 |
| 8 8      | 5                    | 0.015 ± 0.007 | 1                     | 0.010 ± 0.010 | 0                   | 0.000         | 6            | 0.012 ± 0.005 |
| 8 9      | 16                   | 0.048 ± 0.012 | 4                     | 0.038 ± 0.019 | 4                   | 0.046 ± 0.022 | 24           | 0.046 ± 0.009 |
| 8 10     | 18                   | 0.055 ± 0.013 | 8                     | 0.077 ± 0.026 | 3                   | 0.034 ± 0.020 | 29           | 0.056 ± 0.010 |
| 8 10*    | 2                    | 0.006 ± 0.004 | 0                     | 0.000         | 2                   | 0.023 ± 0.016 | 4            | 0.008 ± 0.004 |
| 9 9      | 9                    | 0.027 ± 0.009 | 2                     | 0.019 ± 0.013 | 1                   | 0.011 ± 0.011 | 12           | 0.023 ± 0.007 |
| 9 10     | 29                   | 0.088 ± 0.016 | 15                    | 0.144 ± 0.034 | 10                  | 0.115 ± 0.034 | 54           | 0.104 ± 0.013 |
| 9 10*    | 1                    | 0.003 ± 0.003 | 0                     | 0.000         | 1                   | 0.011 ± 0.011 | 2            | 0.004 ± 0.003 |
| 10 10    | 11                   | 0.033 ± 0.010 | 4                     | 0.038 ± 0.019 | 3                   | 0.034 ± 0.020 | 18           | 0.035 ± 0.008 |
| 10 10*   | 1                    | 0.003 ± 0.003 | 0                     | 0.000         | 0                   | 0.000         | 1            | 0.002 ± 0.002 |
| 10* 10*  | 0                    | 0.000         | 0                     | 0.000         | 1                   | 0.011 ± 0.011 | 1            | 0.002 ± 0.002 |
|          |                      |               |                       |               |                     |               |              |               |

**Table 17b: Absolute (Abs) and relative (Rel) allelic frequencies  $\pm$  standard errors (SE) of human tyrosine (HUMTHO.1) STR polymorphism for three age groups in females.**

|          | Age Group            |               |                       |               |                     |               |              |               |
|----------|----------------------|---------------|-----------------------|---------------|---------------------|---------------|--------------|---------------|
| Allele** | Group 1 (< 73 years) |               | Group 2 (73-90 years) |               | Group 3 (>90 years) |               | Total sample |               |
|          | Abs                  | Rel ± SE      | Abs                   | Rel ± SE      | Abs                 | Rel ± SE      | Abs          | Rel ± SE      |
|          |                      |               |                       |               |                     |               |              |               |
| 6        | 196                  | 0.297 ± 0.018 | 55                    | 0.264 ± 0.031 | 53                  | 0.305 ± 0.035 | 304          | 0.292 ± 0.014 |
| 7        | 102                  | 0.155 ± 0.014 | 34                    | 0.163 ± 0.026 | 26                  | 0.149 ± 0.027 | 162          | 0.155 ± 0.011 |
| 8        | 100                  | 0.152 ± 0.014 | 21                    | 0.101 ± 0.021 | 21                  | 0.121 ± 0.025 | 142          | 0.136 ± 0.011 |
| 9        | 121                  | 0.183 ± 0.015 | 49                    | 0.236 ± 0.029 | 34                  | 0.195 ± 0.030 | 204          | 0.196± 0.012  |
| 10       | 134                  | 0.203 ± 0.016 | 49                    | 0.236 ± 0.029 | 34                  | 0.195 ± 0.030 | 217          | 0.208 ± 0.013 |
| 10*      | 7                    | 0.011 ± 0.004 | 0                     | 0.000         | 6                   | 0.034 ± 0.014 | 13           | 0.012 ± 0.003 |
|          |                      |               |                       |               |                     |               |              |               |

\*\* TH-STR alleles are indicated according to the number of the repeats. 10\* is the imperfect HUMTHO.1 allele 10 (Puers et al., 1993)

Test for Hardy-Weinberg equilibrium (5000 permutations):

- Group 1:  $p = 0.5712$
- Group 2:  $p = 0.4128$
- Group 3:  $p = 0.1856$

**Table 18a: Absolute (Abs) and relative (Rel) genotypic frequencies  $\pm$  standard errors (SE) of human tyrosine (HUMTHO.1) STR polymorphism for three age groups in males.**

|          | Age Group           |               |                       |               |                      |               |              |               |
|----------|---------------------|---------------|-----------------------|---------------|----------------------|---------------|--------------|---------------|
| Genotype | Group 1 (<66 years) |               | Group 2 (66-87 years) |               | Group 3 (> 87 years) |               | Total sample |               |
|          | Abs                 | Rel ± SE      | Abs                   | Rel ± SE      | Abs                  | Rel ± SE      | Abs          | Rel ± SE      |
|          |                     |               |                       |               |                      |               |              |               |
| 6 6      | 17                  | 0.077 ± 0.018 | 18                    | 0.150 ± 0.029 | 5                    | 0.045 ± 0.020 | 40           | 0.089 ± 0.013 |
| 6 7      | 12                  | 0.054 ± 0.015 | 6                     | 0.050 ± 0.020 | 14                   | 0.127 ± 0.032 | 32           | 0.071 ± 0.012 |
| 6 8      | 15                  | 0.068 ± 0.017 | 15                    | 0.125 ± 0.030 | 7                    | 0.064 ± 0.023 | 37           | 0.082 ± 0.013 |
| 6 9      | 35                  | 0.158 ± 0.025 | 15                    | 0.125 ± 0.030 | 20                   | 0.182 ± 0.037 | 70           | 0.155 ± 0.017 |
| 6 10     | 33                  | 0.149 ± 0.024 | 16                    | 0.133 ± 0.031 | 7                    | 0.064 ± 0.023 | 56           | 0.124 ± 0.016 |
| 6 10*    | 1                   | 0.005 ± 0.005 | 0                     | 0.000         | 0                    | 0.000         | 1            | 0.002 ± 0.002 |
| 7 7      | 2                   | 0.009 ± 0.006 | 2                     | 0.017 ± 0.012 | 4                    | 0.036 ± 0.018 | 8            | 0.018 ± 0.006 |
| 7 8      | 13                  | 0.059 ± 0.016 | 6                     | 0.050 ± 0.020 | 4                    | 0.036 ± 0.018 | 23           | 0.051 ± 0.010 |
| 7 9      | 15                  | 0.068 ± 0.017 | 7                     | 0.058 ± 0.021 | 9                    | 0.082 ± 0.026 | 31           | 0.069 ± 0.012 |
| 7 10     | 17                  | 0.077 ± 0.018 | 5                     | 0.042 ± 0.018 | 7                    | 0.064 ± 0.023 | 29           | 0.064 ± 0.012 |
| 7 10*    | 1                   | 0.005 ± 0.005 | 0                     | 0.000         | 1                    | 0.009 ± 0.009 | 2            | 0.004 ± 0.003 |
| 8 8      | 1                   | 0.005 ± 0.005 | 0                     | 0.000         | 1                    | 0.009 ± 0.009 | 2            | 0.004 ± 0.003 |
| 8 9      | 11                  | 0.050 ± 0.015 | 4                     | 0.033 ± 0.016 | 5                    | 0.045 ± 0.020 | 20           | 0.044 ± 0.010 |
| 8 10     | 10                  | 0.045 ± 0.014 | 9                     | 0.075 ± 0.024 | 5                    | 0.045 ± 0.020 | 24           | 0.053 ± 0.011 |
| 9 9      | 9                   | 0.041 ± 0.013 | 3                     | 0.025 ± 0.014 | 5                    | 0.045 ± 0.020 | 17           | 0.038 ± 0.009 |
| 9 10     | 20                  | 0.090 ± 0.019 | 7                     | 0.058 ± 0.021 | 7                    | 0.064 ± 0.023 | 34           | 0.075 ± 0.012 |
| 9 10*    | 1                   | 0.005 ± 0.005 | 1                     | 0.008 ± 0.008 | 3                    | 0.027 ± 0.016 | 5            | 0.011 ± 0.005 |
| 10 10    | 7                   | 0.032 ± 0.012 | 5                     | 0.042 ± 0.018 | 6                    | 0.055 ± 0.022 | 18           | 0.040 ± 0.009 |
| 10 10*   | 1                   | 0.005 ±0.005  | 1                     | 0.008 ± 0.008 | 0                    | 0.000         | 2            | 0.004 ± 0.003 |
|          |                     |               |                       |               |                      |               |              |               |

**Table 18b: Absolute (Abs) and relative (Rel) allelic frequencies  $\pm$  standard errors (SE) of human tyrosine (HUMTHO.1) STR polymorphism for three age groups in males.**

|        | Age Group           |               |                       |               |                      |               |              |               |
|--------|---------------------|---------------|-----------------------|---------------|----------------------|---------------|--------------|---------------|
| Allele | Group 1 (<66 years) |               | Group 2 (66-87 years) |               | Group 3 (> 87 years) |               | Total sample |               |
|        | Abs                 | Rel ± SE      | Abs                   | Rel ± SE      | Abs                  | Rel ± SE      | Abs          | Rel ± SE      |
|        |                     |               |                       |               |                      |               |              |               |
| 6      | 130                 | 0.294 ± 0.022 | 88                    | 0.367 ± 0.031 | 58                   | 0.264 ± 0.030 | 276          | 0.306 ± 0.015 |
| 7      | 62                  | 0.140 ± 0.017 | 28                    | 0.117 ± 0.021 | 43                   | 0.195 ± 0.027 | 133          | 0.147 ± 0.012 |
| 8      | 51                  | 0.115 ± 0.015 | 34                    | 0.142 ± 0.023 | 23                   | 0.105 ± 0.021 | 108          | 0.120 ± 0.011 |
| 9      | 100                 | 0.226 ± 0.020 | 40                    | 0.167 ± 0.024 | 54                   | 0.245 ± 0.029 | 194          | 0.215 ± 0.014 |
| 10     | 95                  | 0.215 ± 0.020 | 48                    | 0.200 ± 0.026 | 38                   | 0.173 ± 0.025 | 181          | 0.201 ± 0.013 |
| 10*    | 4                   | 0.009 ± 0.005 | 2                     | 0.008 ± 0.006 | 4                    | 0.018 ± 0.009 | 10           | 0.011 ± 0.003 |
|        |                     |               |                       |               |                      |               |              |               |

\*\* TH-STR alleles are indicated according to the repeat number. 10\* is the imperfect HUMTHO.1 allele 10 (Puers et al., 1993)

Test for Hardy-Weinberg equilibrium (5000 permutations) :

- Group 1:  $p = 0.3606$
- Group 2:  $p = 0.3594$
- Group 3:  $p = 0.3732$

**Table 19a: Absolute (Abs) and relative (Rel) haplogroup frequencies  $\pm$  standard errors (SE) of Mitochondrial DNA for three age groups in females.**

|              | Age Group            |                |                       |               |                     |               |              |               |
|--------------|----------------------|----------------|-----------------------|---------------|---------------------|---------------|--------------|---------------|
| Haplogroups* | Group 1 (< 73 years) |                | Group 2 (73-90 years) |               | Group 3 (>90 years) |               | Total sample |               |
|              | Abs                  | Rel ± SE       | Abs                   | Rel ± SE      | Abs                 | Rel ± SE      | Abs          | Rel ± SE      |
|              |                      |                |                       |               |                     |               |              |               |
| H,V          | 123                  | 0.373 ± 0.027  | 31                    | 0.094 ± 0.016 | 43                  | 0.130 ± 0.019 | 197          | 0.597 ± 0.027 |
| I,V,X        | 27                   | 0.0818 ± 0.015 | 5                     | 0.015 ± 0.007 | 9                   | 0.027 ± 0.009 | 41           | 0.124 ± 0.018 |
| U,K          | 75                   | 0.2273 ± 0.023 | 34                    | 0.103 ± 0.017 | 18                  | 0.055 ± 0.013 | 127          | 0.385 ± 0.027 |
| J,T          | 65                   | 0.1970 ± 0.022 | 14                    | 0.042 ± 0.011 | 11                  | 0.033 ± 0.010 | 90           | 0.273 ± 0.025 |
| Others       | 40                   | 0.1212 ± 0.018 | 20                    | 0.061 ± 0.013 | 6                   | 0.018 ± 0.007 | 66           | 0.200 ± 0.022 |
|              |                      |                |                       |               |                     |               |              |               |

**Table 19b: Absolute and relative haplogroup frequencies  $\pm$  standard errors of Mitochondrial DNA for three age groups in males.**

|              | Age Group           |               |                       |               |                      |               |              |               |
|--------------|---------------------|---------------|-----------------------|---------------|----------------------|---------------|--------------|---------------|
| Haplogroups* | Group 1 (<66 years) |               | Group 2 (66-87 years) |               | Group 3 (> 87 years) |               | Total sample |               |
|              | Abs                 | Rel ± SE      | Abs                   | Rel ± SE      | Abs                  | Rel ± SE      | Abs          | Rel ± SE      |
|              |                     |               |                       |               |                      |               |              |               |
| H,V          | 89                  | 0.403 ± 0.033 | 41                    | 0.186 ± 0.026 | 38                   | 0.172 ± 0.025 | 168          | 0.760 ± 0.029 |
| I,V,X        | 16                  | 0.072 ± 0.017 | 13                    | 0.059 ± 0.016 | 12                   | 0.054 ± 0.015 | 41           | 0.186 ± 0.026 |
| U,K          | 47                  | 0.213 ± 0.028 | 23                    | 0.104 ± 0.021 | 30                   | 0.136 ± 0.023 | 100          | 0.452 ± 0.033 |
| J,T          | 43                  | 0.195 ± 0.027 | 26                    | 0.118 ± 0.022 | 19                   | 0.086 ± 0.019 | 88           | 0.398 ± 0.033 |
| Others       | 26                  | 0.118 ± 0.022 | 17                    | 0.077 ± 0.018 | 11                   | 0.050 ± 0.015 | 54           | 0.244 ± 0.029 |
|              |                     |               |                       |               |                      |               |              |               |

\*Mitochondrial DNA haplogroups were pooled according to the phylogenetic proximity
